# Supplementary material
Source: PubMed Central journal article supplement (PMC9887384)
Supplement: ip-2022-044700supp001.pdf [file ip-2022-044700supp001.pdf]

## SUPPLEMENTARY MATERIAL

**Supplementary Figure:** Combined Beeswarm plot and Boxplot of nonfatal shooting rate by intersectional group.

Notes for Supplementary Figure:

In the supplementary figure, we use boxplots of intersectional groups' nonfatal shooting rates to highlight that there is a dose-responsive relationship between exposure to structural racism on nonfatal shootings. Greater exposure to racism results in higher nonfatal shooting rates. The boxplots of intersectional groups exposed to present-day and combined racism (historical and present-day) are higher compared to other boxplots. This signifies that present-day racism has a stronger effect on nonfatal shooting rates compared to historical racism. This is displayed in the figure by the previous advantage group boxplot being higher than the contemporary advantage group's boxplot.

Nonfatal shooting rates generated from data provided by the Baltimore Police Department and the 5-year 2019 U.S. Census Bureau American Community Survey. Intersectional groups created with data from the Mapping Inequality Project and the 5-year 2019 U.S. Census Bureau American Community Survey. Excluded tracts did not have HOLC grades assigned to them or did not contain residential zoning. Citywide median annualized nonfatal shooting rate is 9.06 per 10,000 residents.

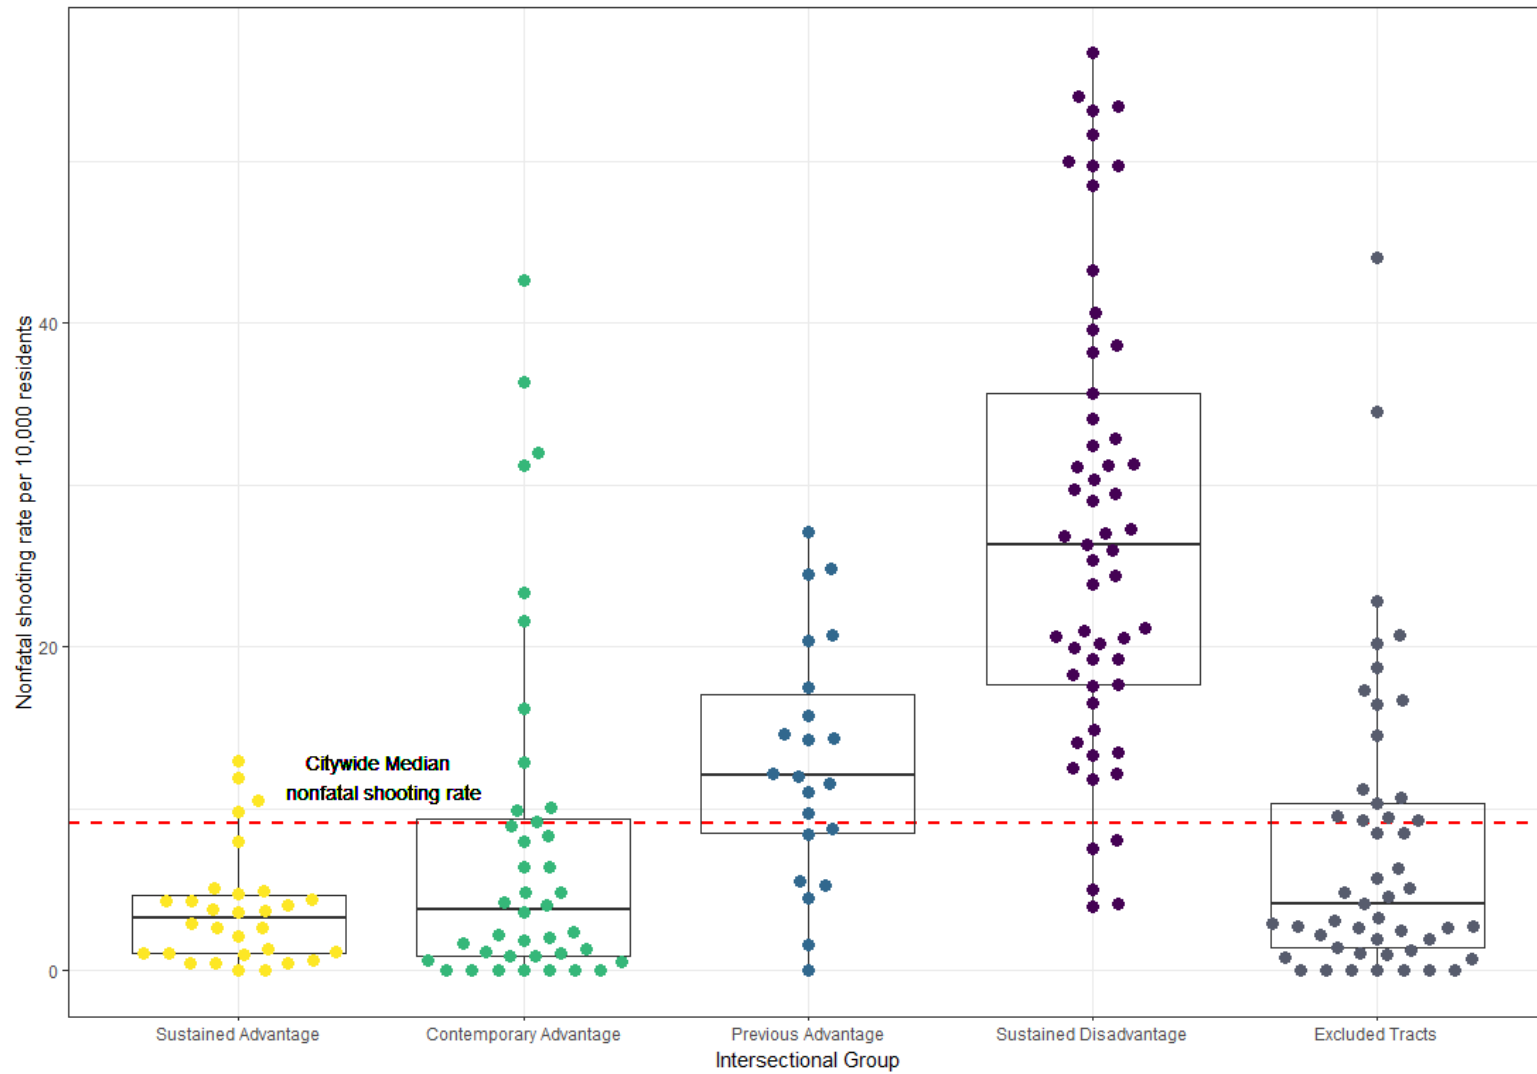

### Notes for Figures 2, 3, and 4

#### Notes for Figure 2:

Intersectional Groups created with data from the Mapping Inequality Project and 5-year 2019 U.S. Census Bureau American Community Survey. Excluded tracts did not have HOLC grades assigned to them or did not contain residential zoning

#### Notes for Figure 3:

Nonfatal shooting rates generated from data provided by the Baltimore Police Department and the 5-year 2019 U.S. Census Bureau American Community Survey. Intersectional groups created with data from the Mapping Inequality Project and the 5-year 2019 U.S. Census Bureau American Community Survey. Excluded tracts did not have HOLC grades assigned to them or did not contain residential zoning. Citywide median annualized nonfatal shooting rate is 9.06 per 10,000 residents.

#### Notes for Figure 4:

Nonfatal shooting rates generated from data provided by the Baltimore Police Department and the 5-year 2019 U.S. Census Bureau American Community Survey. Excluded tracts did not have HOLC grades assigned to them or did not contain residential zoning
